# Supplementary material for: Nebraska Standards on Search and Seizure
Source: Royal Society of Chemistry journal article supplement (doi:10.1039/d4ay00236a), 1977-01-01
Supplement: d4ay00236a1.pdf [file d4ay00236a1.pdf]

## Supplementary material

to

# Luminescent and Time Resolved Determination of Gemifloxacin Mesylate in Pharmaceutical Formulations and Spiked Blood Plasma Samples Using a Lanthanide Complex as a Probe

Gasser M. Khairy<sup>1\*</sup>, Rania M. Goda<sup>1</sup>, Zeinab M. Anwar<sup>1</sup>, Mohamed M. Aboelnga<sup>2</sup>, Axel Duerkop<sup>3\*</sup>

<sup>1</sup> Chemistry Department, Faculty of Science, Suez Canal University, 41522 Ismailia, Egypt

<sup>2</sup> Chemistry Department, Faculty of Science, Damietta University, New Damietta 34517, Egypt

<sup>3</sup> Institute of Analytical Chemistry, Chemo and Biosensors, Faculty of Chemistry and Pharmacy, University of Regensburg, 93053 Regensburg, Germany.

\* Correspondence: gasser\_mostafa@science.suez.edu.eg (G.M.K.); axel.duerkop@ur.de (A.D.)

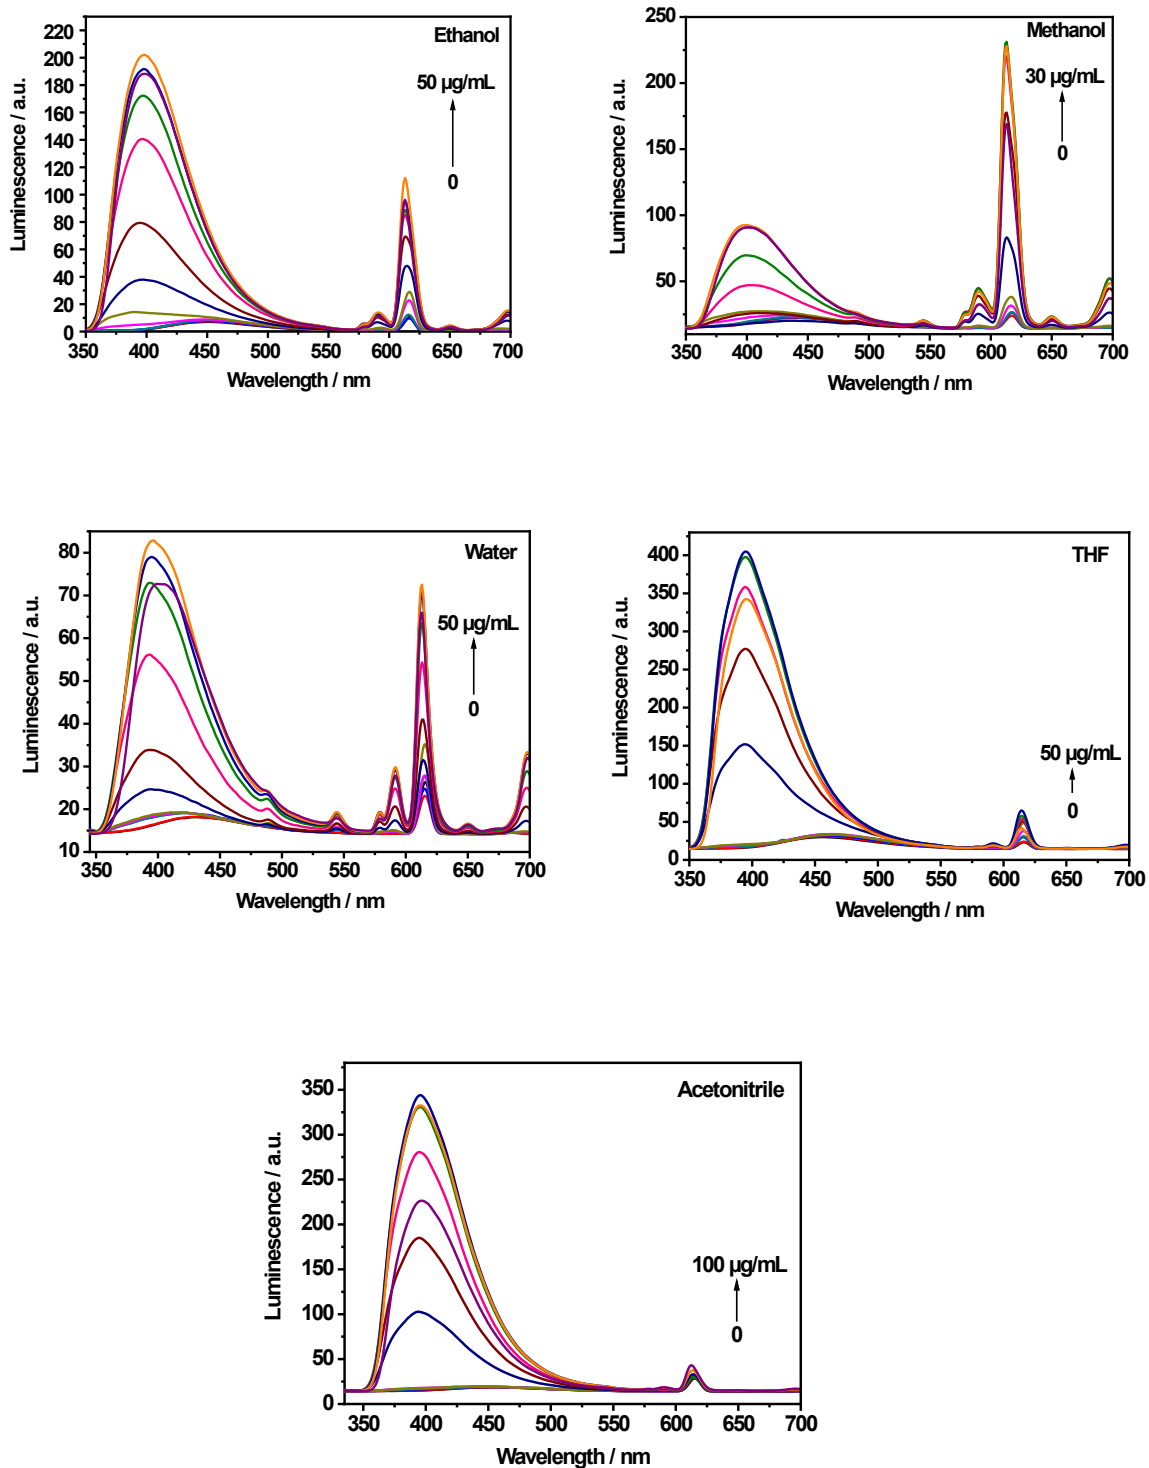

**Fig. S1** Luminescence spectra of  $1 \cdot 10^{-5}$  mol/L Eu-(AZ)<sub>2</sub> with various concentrations of GMF (0, 0.01, 0.05, 0.1, 0.5, 1, 5, 10, 20, 30, 40, 50, 100  $\mu\text{g mL}^{-1}$ ) at  $\lambda_{\text{exc/em}} = 307 \text{ nm} / 615 \text{ nm}$  and in different

solvents at room temperature

**Table S1** Concentrations of interferences tolerated in the presence of 5 µg mL<sup>-1</sup> of GMF.

| <b>Interferent</b>         | <b>Concentration (µg / mL)</b> | <b>GMF/Interferent Ratios</b> |
|----------------------------|--------------------------------|-------------------------------|
| Anhydrous lactose          | 15100                          | 0.000331                      |
| Avicel PH101               | 3200                           | 0.00156                       |
| Talc                       | 57200                          | 8.75 x 10 <sup>-5</sup>       |
| Titanium dioxide           | 640                            | 0.00781                       |
| Magnesium stearate         | 10200                          | 0.000490                      |
| Croscarmellose sodium salt | 4250                           | 0.00118                       |
| PVP K30                    | 35000                          | 0.000143                      |
| starch                     | 10000                          | 0.000500                      |
